# Supplementary material
Source: Research Square preprint supplement (doi:10.21203/rs.3.rs-8927994/v1)
Supplement: Supplementary file 1 [file 7b10f2bf186a115fbccdcc06.docx]

**Supplement B. Individual Weekly Assessment and Evaluation**

1. I am confident in my ability to generate prompts. (Strongly Agree=1 to Strongly Disagree=4)

2. The session was valuable. (Strongly Agree=1 to Strongly Disagree=4)

3. I would recommend this session to other students. (Strongly Agree=1 to Strongly Disagree=4)

4. The session was facilitated well. (Strongly Agree=1 to Strongly Disagree=4)

5. The summary is helpful for treating the patient. (Strongly Agree=1 to Strongly Disagree=4)

6. The key takeaways are helpful for treating the patient. (Strongly Agree=1 to Strongly Disagree=4)

7. The top 10 references are helpful for treating the patient. (Strongly Agree=1 to Strongly Disagree=4)

8. Point out the most useful reference. (open-ended response)

9. Point out the missing references if any. (open-ended response)

10. Check any additional feature on SCOPUS AI that looks interesting. (open-ended response)

11. Please share one important take home point you learned from today’s session. (open-ended response)
