# Supplementary material
Source: Research Square preprint supplement (doi:10.21203/rs.3.rs-8927994/v1)
Supplement: Supplementary file 2 [file e58fe560876ffc12ae3388b5.docx]

**Supplement A. Facilitator Guide**

**Facilitator Guide: Prompt Engineering**

*Reviewed and Updated 2/10/26*

**Background.**  This 3-part program is designed to demonstrate to students the value of using prompt engineering for addressing evidence-based medicine (EBM) questions while caring for patients. The program consists of three 45-minute one-on-one sessions in a live facilitated video conference format.

**Student Learning Objectives**. At the end of this program, students will be able to:

- Demonstrate the use of generative AI prompts to help you answer evidence-based medicine questions.
- Construct AI prompts using PICO (patient/population, intervention, comparison/control, outcome) and CLEAR (concise, logical, explicit, adaptive, reflective) frameworks.
- Explain the benefits of using a closed AI system, like Scopus AI, when researching evidence-based medicine questions.

**General Tips and Insights for facilitators.** Students generally enjoy this program for a variety of reasons.

- First, they learn how to apply AI to patient care and clinical research in a responsible manner.
- Second, they are encouraged to experiment (play) with a tool, Scopus AI, with which most are not familiar.
- Third, with the live video conferencing format, they are able to participate from any location and schedule sessions easily.
- Fourth, they enjoy engaging with faculty one-on-one. Stay positive, supportive, encouraging, and curious. You’ll likely learn something from the students as well.

**General Session Structure.** Each session will follow the following general structure.

- Session orientation
- Educational activity
- Application
- Evaluation
- Review and wrap-up

**Facilitators.** Please reach out to these program developers and facilitators for questions, tips or brainstorming.

- Erik Langenau, DO, MS, MAPP

Professor, Pediatrics; Chief Academic Technology Officer

Philadelphia College of Osteopathic Medicine

[ErikLa@pcom.edu](mailto:ErikLa@pcom.edu)

- Hsinliang “Oliver” Chen, PhD

Professor, Library Sciences; Chief Library Services Officer

Philadelphia College of Osteopathic Medicine

[HsinliaCh@pcom.edu](mailto:HsinliaCh@pcom.edu)

**Session 1: Introduction to Prompt Engineering and Scopus AI**

1. Orientation
   1. Start the video conference. Log into the session (GoogleMeet) to begin the session.
   2. Welcome. Thank the student for joining to learn about an AI-supported product to assist them with evidence-based searches to help them care for patients.
   3. Review the three learning objectives for the program.
   4. Acknowledge recording (if applicable). If you are recording the session, obtain permission and remind them that the session will be recorded. (Start recording)
2. Educational Activity
   1. Show the student where to locate Scopus AI.
      1. Send the student this link (cut and paste into chat): <https://libguides.pcom.edu/db/scopus-ai>
      2. Ask the student to login and select “Scopus AI”
   2. Explain the task for Session 1: review the scenario, create a prompt with evidence-based recommendations to care for patients, and review the prompt output. “During today’s session, you will be given a short clinical scenario, a scenario which is likely familiar to you. You’ll construct a prompt to help you locate evidence-based recommendations that will help care for the patient in this scenario. Using Scopus AI, you’ll find answers to your question, along with supporting literature.”
   3. Show orientation to Scopus AI. “Before you start searching this topic, please watch this short SCOPUS AI tutorial” <https://youtu.be/d0W3MT_OxwE>.
   4. Provide an example scenario and develop an AI prompt together:
      1. Practice Scenario: Allow the student to suggest a scenario or topic, something they are interested in learning.
      2. Review the student’s prompt and Scopus AI output. Highlight the similarities to other open AI search products (such as ChatGPT)
3. Application
   1. Share the clinical scenario (read aloud) with the student. “A female patient with a Hb A1C level of 7.5%. She is 51 years old with a BMI of 32. She is a Septa driver, eats fast food once a day, and admits she rarely eats vegetables. She is interested in losing weight and controlling her newly diagnosed diabetes. She hopes to avoid medication and wants some advice. She wants to know if lifestyle changes can work.” An adaptation could be a video or audio recording of this statement with a simulated patient. Avoid “cutting and pasting” the scenario into the chat, as students may simply place that in the search area.
   2. Ask the student to “share screen.” By doing this, you can (1) verify the student has located and is using Scopus AI correctly, and (2) visualize what the student sees as you review the output together.
   3. Ask the student to use that information provided to create a search phrase (prompt) and enter the prompt into Scopus AI.
   4. Review the output with the student.
   5.
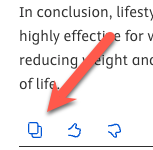
If the student wishes to make adjustments, invite the student to restate and renter the prompt. Review the revised output with the student.
   6. If you’d like the student to share results with you, ask the student to (1) select the “copy” icon at the bottom of the output and (2) share with you (e.g. paste into an email or assignment link).
4. Evaluation
   1. Invite the student to complete the form (eg. Google form with [Weekly Evaluation questions)](#ewhfjbmkyyez). If you’d like the student to submit their output with you, have them forward it by email or assignment link (3f above).
5. Review
   1. Review session 1 teaching points:
      1. Scopus AI is a research tool to help you collect information using Elsevier's resources, which is more reliable than publicly referenced material such as blogs and non-vetted websites. Relevant articles from other databases (government websites and resources from other publishers, for instance) may be missed when using Scopus AI.
      2. Prompt engineering is the term we use to describe the question you pose. The quality of the question you pose will inform the quality of the response. For instance, a more detailed prompt will generally generate a more detailed and relevant response. We’ll be reviewing tips to improve your prompt engineering skills over the next three weeks.
6. Wrap up and Conclusion
   1. Thank them for participating, and then schedule the next session.

**Session 2: PICO Application and Scopus AI**

1. Orientation
   1. Start the video conference. Log into the session (GoogleMeet) to begin the session.
   2. Welcome. Thank the student for joining to learn about an AI-supported product to assist them with evidence-based searches to help them care for patients.
   3. Review the three learning objectives for the program.
   4. Acknowledge recording (if applicable). If you are recording the session, obtain permission and remind them that the session will be recorded. (Start recording)
2. Educational Activity
   1. Remind the student where to locate Scopus AI.
      1. Send the student this link (cut and paste into chat): <https://libguides.pcom.edu/db/scopus-ai>
      2. Ask the student to login and select “Scopus AI”
   2. Provide context and introduction. Explain the task for Session 2: learn about PICO as a strategy to ask clinical oriented evidence-based questions, review the clinical scenario, create a prompt with evidence-based recommendations to care for patients, and review the prompt output.
   3. Have the student review PICO (<https://library.rush.edu/literature_reviews/search_strategy>)
   4. Provide an example (scenario and PICO elements) and work out the final PICO query together:
      1. Practice Scenario: A 10-year-old child with ADHD is struggling academically, and their parents are asking about the effectiveness of behavioral therapy versus medication.
      2. PICO elements could be something like the following
         - P (Patient/Population): Children with ADHD
         - I (Intervention): Behavioral therapy
         - C (Comparison/Control): Medication (e.g., methylphenidate)
         - O (Outcome): Improvement in academic performance
         - Query. Compared to treatment with medication, is academic performance improved with behavioral therapy for children with ADHD?
      3. Review the student’s prompt and Scopus AI output.
3. Application
   1. Share the clinical scenario (read aloud) with the student. “A female patient with a Hb A1C level of 7.5%. She is 51 years old with a BMI of 32. She is a Septa driver, eats fast food once a day, and admits she rarely eats vegetables. She is interested in losing weight and controlling her newly diagnosed diabetes. She hopes to avoid medication and wants some advice. She wants to know if lifestyle changes can work.” Acknowledge that this is the same scenario as used in week 1, but this time we’ll apply the PICO format. An adaptation could be a video or audio recording of this statement with a simulated patient. Avoid “cutting and pasting” the scenario into the chat, as students may simply place that in the search area.
   2. Ask the student to “share screen.” By doing this, you can (1) verify the student has located and is using Scopus AI correctly, and (2) visualize what the student sees as you review the output together.
   3.
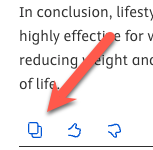
Ask the student to use that information provided to create a search phrase (prompt) and enter the prompt into Scopus AI.
   4. Review the Scopus AI output with the student.
   5. If the student wishes to make adjustments, invite the student to restate and renter the prompt. Review the revised output with the student.
   6. If you’d like the student to share results with you, ask the student to (1) select the “copy” icon at the bottom of the output and (2) share with you (e.g. paste into an email or assignment link).
4. Evaluation
   1. Invite the student to complete the form (eg. Google form with [Weekly Evaluation questions)](#ewhfjbmkyyez). If you’d like the student to submit their output with you, have them forward it by email or assignment link (3f above).
5. Review
   1. Review session 2 teaching points:
      1. PICO is a traditional model to investigate clinical topics. It has been used for years to help clinicians with EBM searches. Skill comes with practice.
      2. PICO components
         - Patient or population/disease: Which population are you studying? (Consider age, gender, ethnicity, group with a certain disorder, etc.)
         - Intervention, prognostic factor, or exposure: What do you want to do for the patient? (Consider therapy, exposure to a disease, risk behavior, prognostic factor, preventative measure, or diagnostic test)
         - Comparison or control: Are you comparing two interventions or variables? (Consider absence of disease, absence of risk factor, or use of placebo)
         - Outcome: What is the expected result or what do you hope to accomplish, improve, or affect? (Consider disease incidence, accuracy of a diagnosis, rate of occurrence of adverse outcome, survival or mortality rates.)
6. Wrap up and Conclusion
   1. Thank them for participating, and then schedule the next session.

**Session 3: CLEAR Application and Scopus AI**

1. Orientation
   1. Start the video conference. Log into the session (GoogleMeet) to begin the session.
   2. Welcome. Thank the student for joining to learn about an AI-supported product to assist them with evidence-based searches to help them care for patients.
   3. Review the three learning objectives for the program.
   4. Acknowledge recording (if applicable). If you are recording the session, obtain permission and remind them that the session will be recorded. (Start recording)
2. Educational Activity
   1. Remind the student where to locate Scopus AI.
      1. Send the student this link (cut and paste into chat): <https://libguides.pcom.edu/db/scopus-ai>
      2. Ask the student to login and select “Scopus AI”
   2. Provide context and introduction. Explain the task for Session 3: learn about CLEAR as a strategy to ask clinical oriented evidence-based questions, review the clinical scenario scenario, create a prompt with evidence-based recommendations to care for patients, and review the prompt output.
   3. Share “CLEAR is a contemporary model for prompt engineering. There are many other models, but this one is particularly helpful with AI searches (such as those done with Scopus AI). Skill comes with practice. CLEAR components: Concise, Logical, Explicit, Adaptive, and Reflective”
   4. Have the student review CLEAR (Erin Burns, CLEAR Framework for Prompting, <https://www.youtube.com/watch?v=G-XXW1qVRn0> ) (Time: 2:40-5:35)
   5. Provide an example (scenario and CLEAR elements) and work out final CLEAR prompt together:
      1. Practice Scenario: A 10-year-old child with ADHD is struggling academically, and their parents are asking about the effectiveness of behavioral therapy versus medication.
      2. CLEAR elements could produce something like the following:
         - Query. In children with ADHD, does behavioral therapy improve academic performance compared to medication?
      3. Review the student’s prompt and Scopus AI output.
3. Application
   1. Share the clinical scenario (read aloud) with the student. “A 17-year-old girl is discharged from the hospital after surgery to repair her compound femur fracture. She has a history of substance use disorder (marijuana) and wants to avoid opioids. She wants to know if she “needs” opioids or will NSAIDs work for her pain.” An adaptation could be a video or audio recording of this statement with a simulated patient. Avoid “cutting and pasting” the scenario into the chat, as students may simply place that in the search area.
   2. Ask the student to “share screen.” By doing this, you can (1) verify the student has located and is using Scopus AI correctly, and (2) visualize what the student sees as you review the output together.
   3.
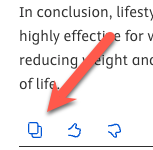
Ask the student to use that information provided to create a search phrase (prompt) and enter the prompt into Scopus AI.
   4. Review the output with the student.
   5. If the student wishes to make adjustments, invite the student to restate and renter the prompt. Review the revised output with the student.
   6. If you’d like the student to share results with you, ask the student to (1) select the “copy” icon at the bottom of the output and (2) share with you (e.g. paste into an email or assignment link).
4. Evaluation
   1. Invite the student to complete the form with you (eg. Google form with [Weekly Evaluation questions)](#ewhfjbmkyyez). If you’d like the student to submit their output with you, have them forward it by email or assignment link (3f above).
5. Review
   1. Review session 3 teaching points:
      1. CLEAR is a contemporary semi-structured model for prompt engineering. There are many other models, but this one is particularly helpful with AI searches (such as those done with Scopus AI). Skill and confidence come with practice.
      2. CLEAR components
         - Concise, Logical, Explicit, Adaptive, and Reflective
6. Wrap up and Conclusion
   1. Thank them for participating.

**References**

- PCOM Library. https://library.pcom.edu/
- Scopus AI Information. <https://www.elsevier.com/products/scopus/scopus-ai>
- Scopus AI link for PCOM faculty and students. <https://libguides.pcom.edu/db/scopus-ai>
- Scopus AI orientation for PCOM faculty and students. <https://youtu.be/d0W3MT_OxwE>
- CLEAR Framework for Prompting. <https://www.youtube.com/watch?v=G-XXW1qVRn0>
- PICO Description (Rush Library). <https://library.rush.edu/literature_reviews/search_strategy>

**Appendix A. Weekly Evaluation.**  These are the questions posed to the students after each one-on-one facilitated session.

| Question: Please identify the degree to which you agree or disagree with the following statements | Response |
| --- | --- |
| 1. I am confident in my ability to generate prompts | 1 (strongly agree), 2 (agree), 3 (disagree), 4 (strongly disagree). |
| 1. The session was valuable. | 1 (strongly agree), 2 (agree), 3 (disagree), 4 (strongly disagree). |
| 1. I would recommend this session to other students. | 1 (strongly agree), 2 (agree), 3 (disagree), 4 (strongly disagree). |
| 1. The session was facilitated well. | 1 (strongly agree), 2 (agree), 3 (disagree), 4 (strongly disagree). |
| 1. The summary is helpful for treating patients. | 1 (strongly agree), 2 (agree), 3 (disagree), 4 (strongly disagree). |
| 1. The key takeaways are helpful for treating patients. | 1 (strongly agree), 2 (agree), 3 (disagree), 4 (strongly disagree). |
| 1. The top 10 references are helpful for treating patients. | 1 (strongly agree), 2 (agree), 3 (disagree), 4 (strongly disagree). |
| 1. Point out the useful references | Open-ended |
| 1. Point out the missing references if any | Open-ended |
| 1. Check any additional feature on SCOPUS AI that looks interesting and give your feedback | Open-ended |
| 1. Please share one important takehome point you learned from today’s session. | Open-ended |
