# Supplementary material
Source: Research Square preprint supplement (doi:10.21203/rs.3.rs-8927994/v1)
Supplement: Supplementary file 3 [file fd506beb6aeb98fdfadee635.docx]

**Supplement C. Structured Interview Questions**

1. What has been your previous experience with AI? ChatGPT, Gemini, others?
2. Did you find this three-session one-on-one program helpful? Did you like the format? What would you recommend for the future?
3. What was your experience with SCOPUS AI? The prompt box, availability of the search history, display format, the location and quality of the references, features of expanded summary, concept map, go deeper, etc.
4. Did you find the PICO format helpful for your prompt creation? Please elaborate.
5. Did you find the CLEAR format helpful for your prompt creation? Please elaborate.
6. What is the difference between your previous AI experience, compared to Scopus AI with CLEAR and PICO?
7. How do you think you’ll use what you learned in this program to take care of patients?
8. Additional comments.
